# Supplementary material for: Plasmalogen loss caused by remodeling deficiency in mitochondria
Source: Life Sci Alliance. 2019 Aug 21;2(4):e201900348. doi: 10.26508/lsa.201900348 (PMC6707388; doi:10.26508/lsa.201900348)
Supplement: Supplementary file 4 [file LSA-2019-00348_TableS2.docx]

| **Table S2. Contents and Changes (mol %)1 of**  **the Liver Phospholipids of the WT versus TAZ-KD Mice** | | | | | |
| --- | --- | --- | --- | --- | --- |
| phospholipid | chemical shift2 (ppm) | content | | change in contribution to the total phospholipid | change in terms of the individual content |
| WT | TAZ-KD | TAZ-KD ‒ WT | [(TAZ-KD ‒ WT)/WT]×100 |
| diacyl PC (+ plasmanylcholine)3 | ‒0.177 | 58.6 ± 1.5 | 53.9 ± 0.7 | ‒4.7 ± 1.7 | ‒8.0 ± 2.9 |
| plasmenylcholine | (‒0.166)4 | N.R.5 | N.R.5 | N.A.7 | N.A.7 |
| PI | 0.032 | 7.8 ± 0.4 | 7.8 ± 1.3 | 0.0 ± 1.4 | ‒0.4 ± 17.4 |
| PS | 0.125 | 3.3 ± 0.4 | 3.3 ± 0.5 | +0.1 ± 0.6 | +1.5 ± 19.3 |
| lyso PC | 0.203 | 2.9 ± 0.8 | 1.3 ± 0.1 | ‒1.6 ± 0.8 | ‒55.4 ± 27.5 |
| diacyl PE (+ plasmanylethanolamine)3 | 0.295 | 18.8 ± 1.9 | 25.4 ± 1.7 | +6.6 ± 2.5 | +34.8 ± 13.4 |
| plasmenylethanolamine | 0.333 | 2.5 ± 0.3 | 1.8 ± 0.3 | ‒0.8 ± 0.4 | ‒29.8 ± 16.8 |
| SM | 0.395 | 3.5 ± 0.2 | 3.8 ± 0.1 | +0.2 ± 0.2 | +7.0 ± 6.5 |
| lyso PE | 0.666 | 0.6 ± 0.3 | 0.3 ± 0.0 | ‒0.3 ± 0.3 | ‒56.9 ± 50.4 |
| CL | 0.742 | 1.7 ± 0.1 | 1.7 ± 0.4 | 0.0 ± 0.4 | ‒1.0 ± 20.6 |
| PG | 0.841 | 0.2 ± 0.0 | 0.2 ± 0.0 | 0.0 ± 0.1 | +24.6 ± 30.4 |
| 1-MLCL | 1.005 | N.D.6 | 0.2 ± 0.1 | +0.2 ± 0.1 | N.A.7 |
| 2-MLCL | 1.130 | N.D.6 | 0.3 ± 0.1 | +0.3 ± 0.1 | N.A.7 |
| 1The average and error, shown as the standard deviation, are obtained from three independent biological samples (N = 3) for each of the WT and TAZ-KD mice.  2Values are from observation at 25°C in 10% (w/v) SDS micellar solution at pH=6.0 [50 mM MES, 50 M BHT, 10% (v/v) D2O], in reference to the diacyl PE (with plasmanylethanolamine) peak set to 0.295 ppm as an internal standard (Kimura et al., 2018).  3The signal of the plasmanyl glycerophospholipid as a minor component overlaps with the signal of the counterpart diacyl glycerophospholipid (Kimura et al., 2018).  4Value estimated based on the difference from that of diacyl PC (+ plasmanylcholine) (Kimura et al., 2018); see footnote 5 in Table S1. The standard deviation of measured chemical shift values of diacyl PC (with plasmanylcholine) in the lipid extract from the liver tissue was 0.004 ppm.  5Signal not resolved.  6Not detected.  7Not applicable.  **Reference**  Kimura, T., A.K. Kimura, M.D. Ren, B. Berno, Y. Xu, M. Schlame, and R.M. Epand. 2018. Substantial decrease in plasmalogen in the heart associated with tafazzin deficiency. Biochemistry. 57:2162-2175. | | | | | |
